# Supplementary material
Source: PubMed Central journal article supplement (PMC9934976)

**Supplementary Figure 1. Gating strategy for T cells, eosinophils, neutrophils and alveolar macrophages in BALF samples.**

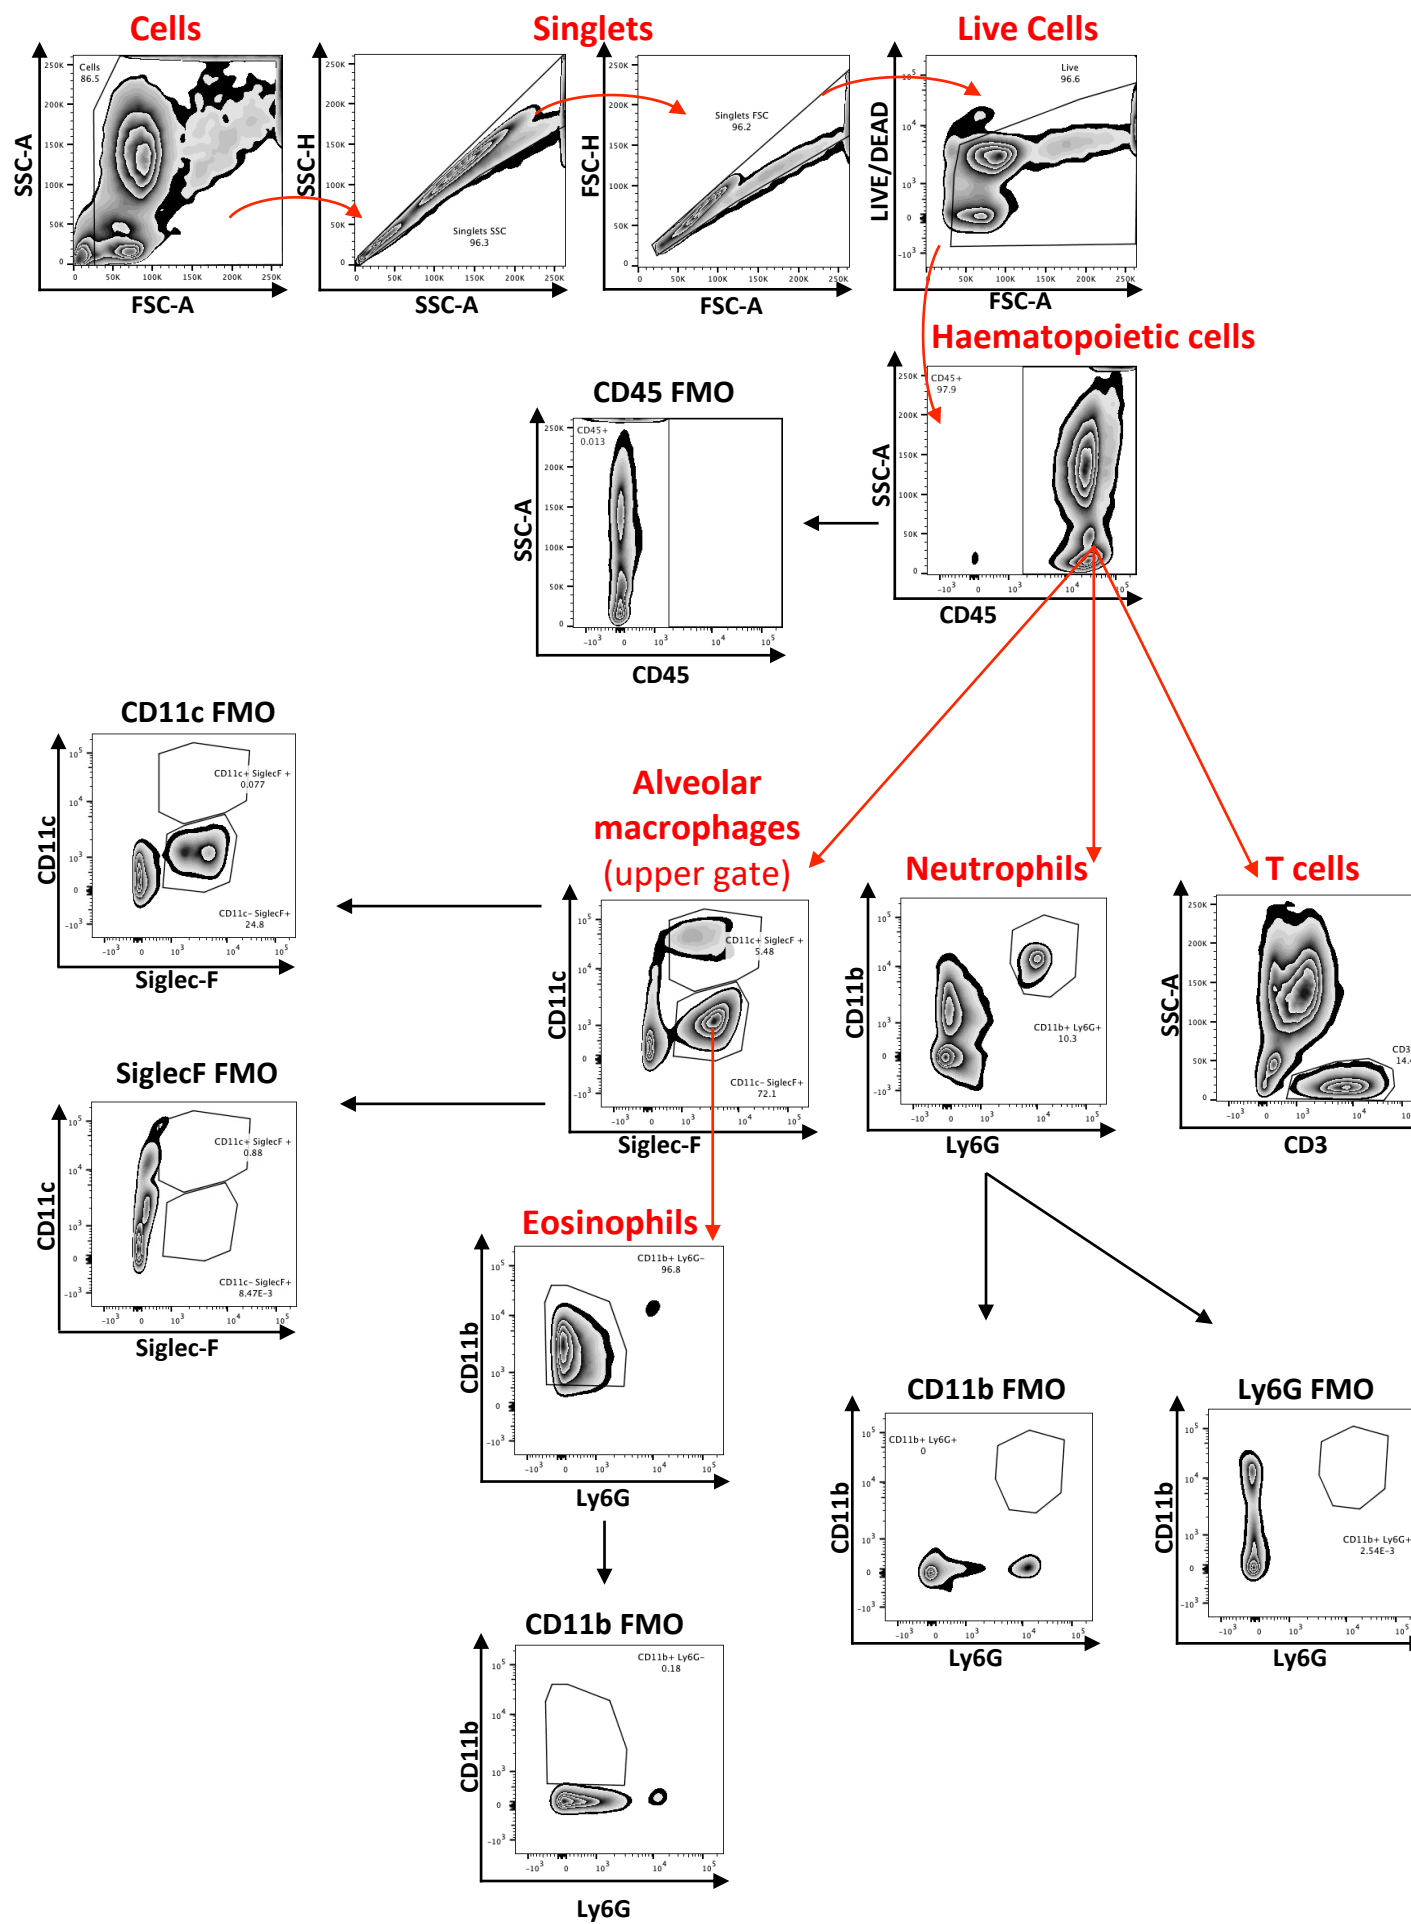

# Supplementary Figure 2. Gating strategy for T cells, eosinophils, neutrophils and alveolar macrophages in lung samples.

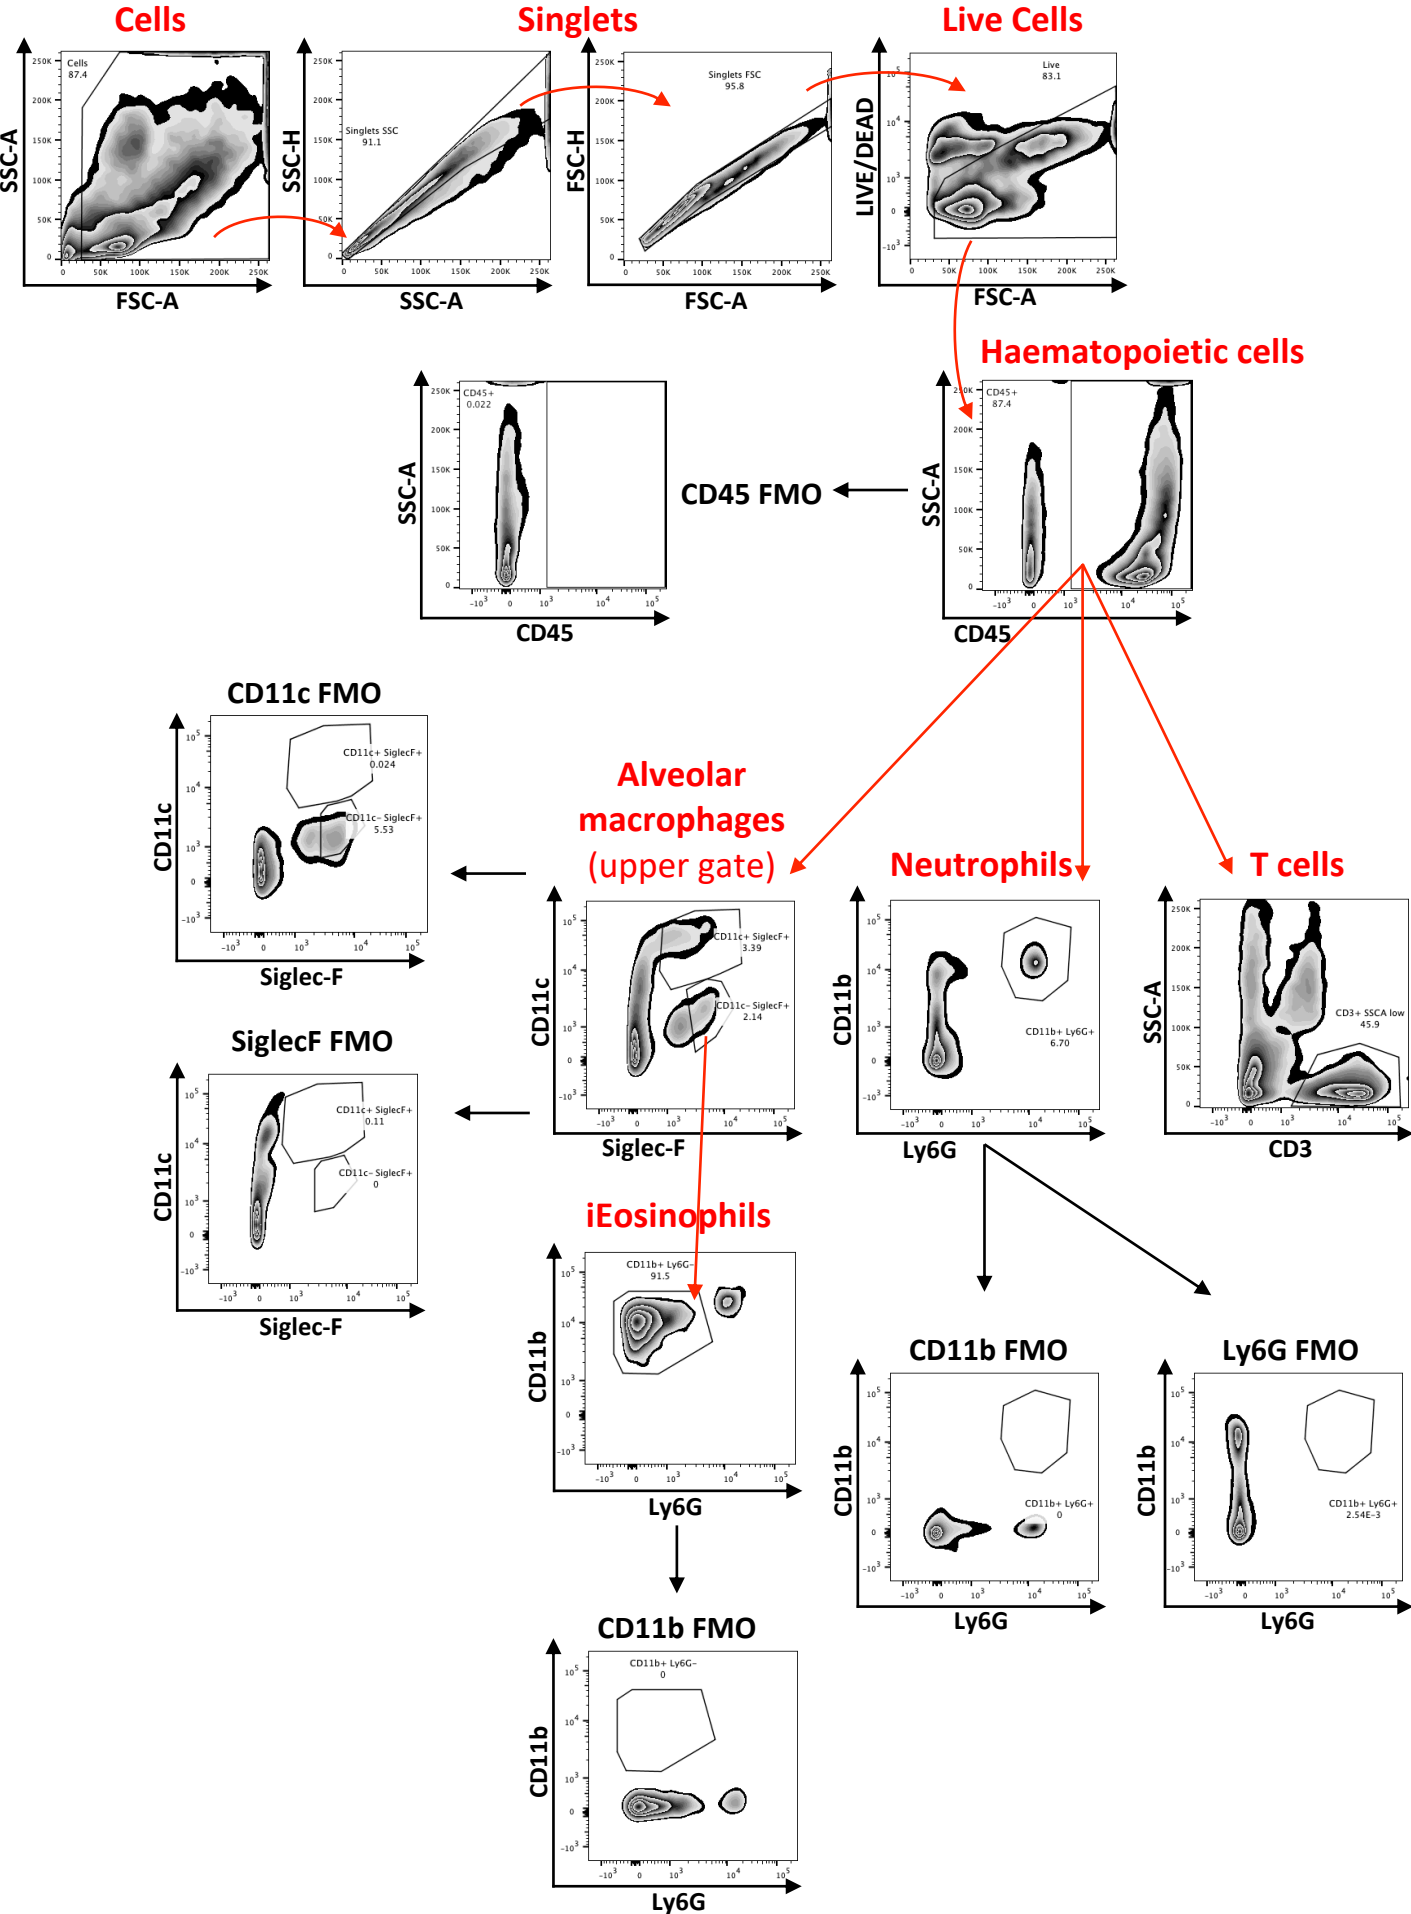

**A**

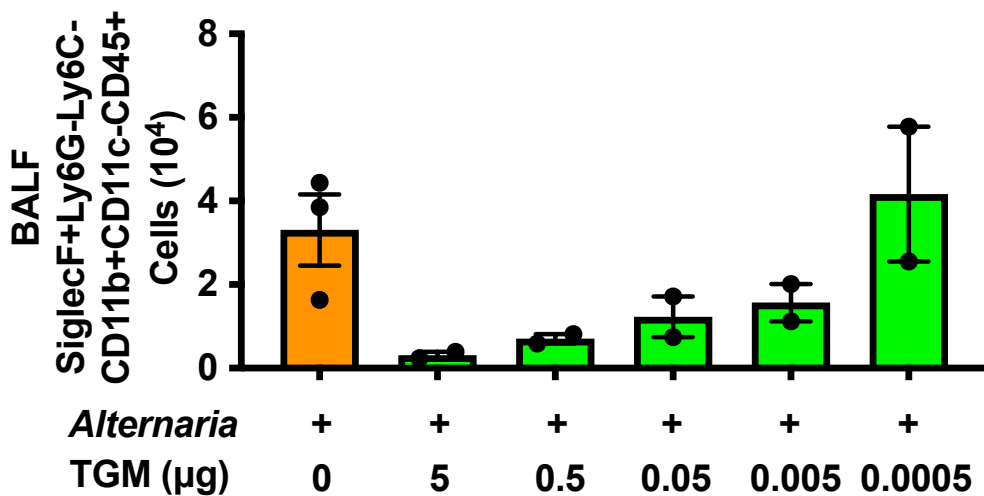

**B**

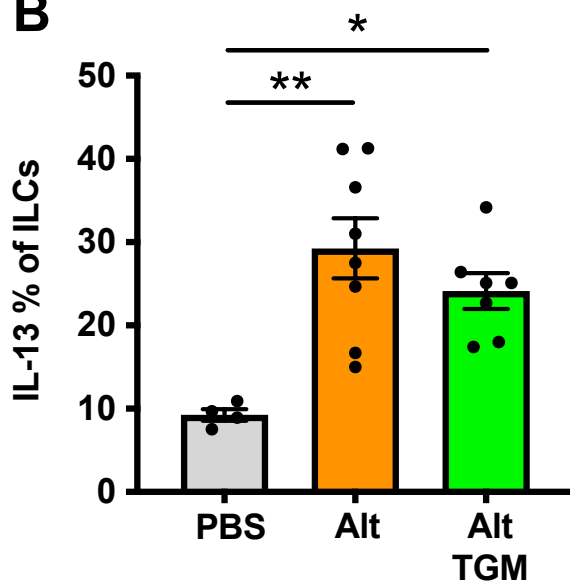

**C**

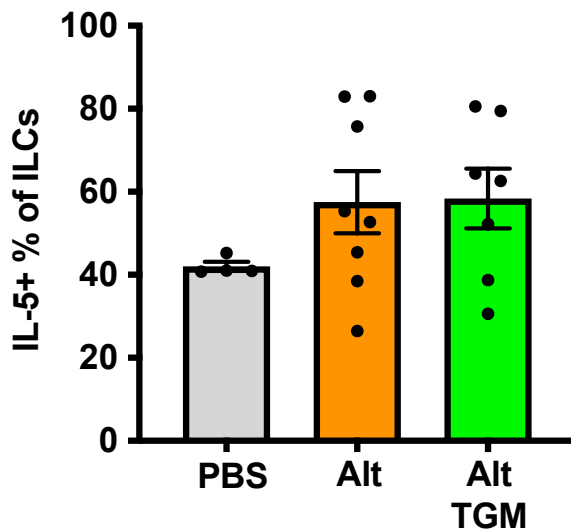

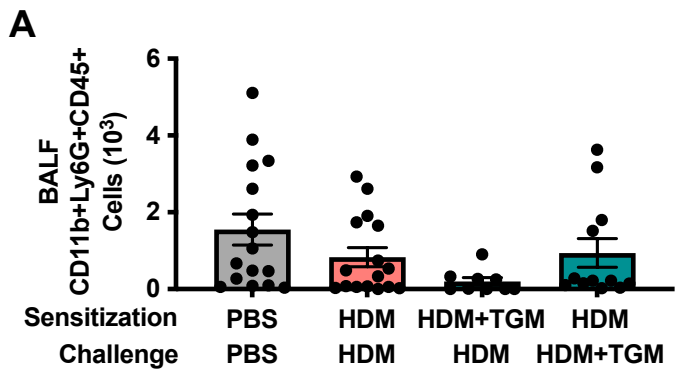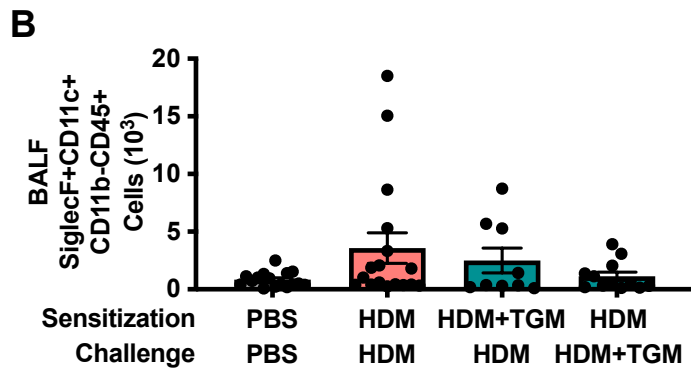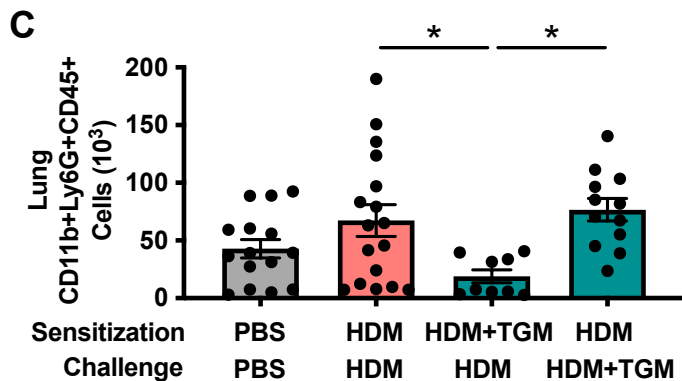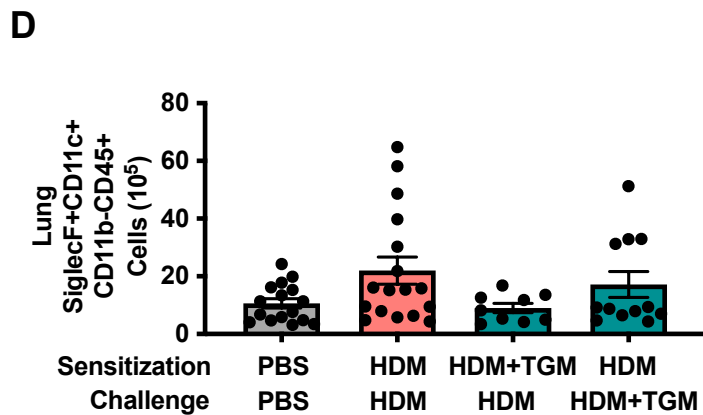

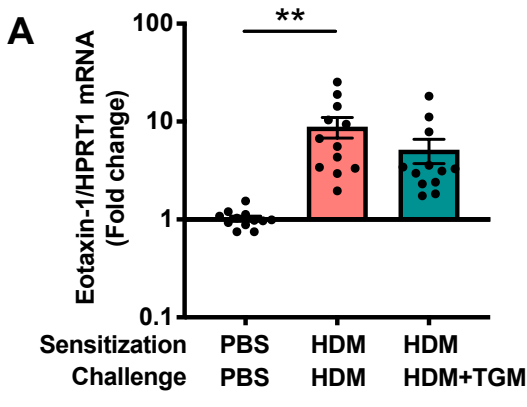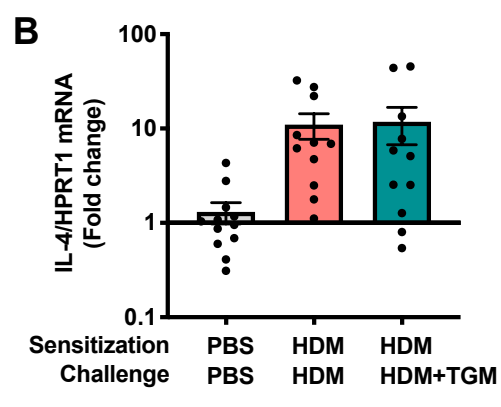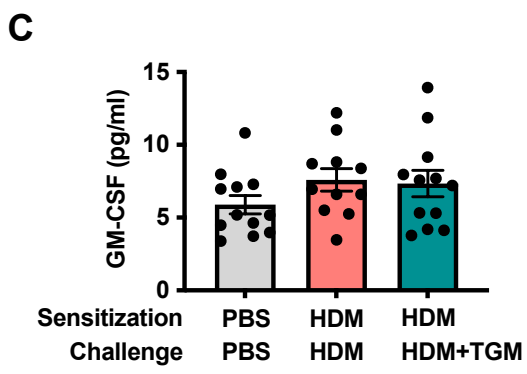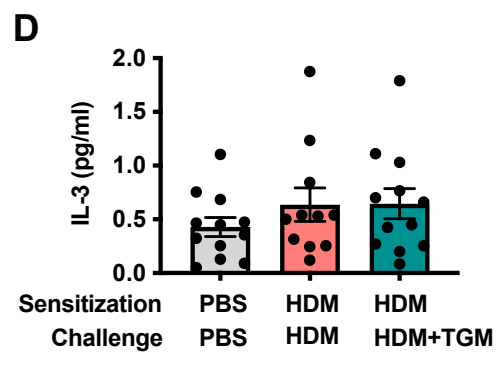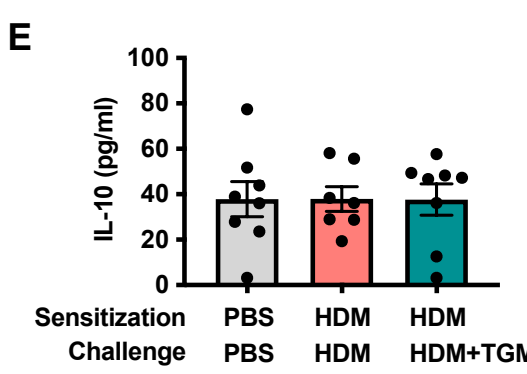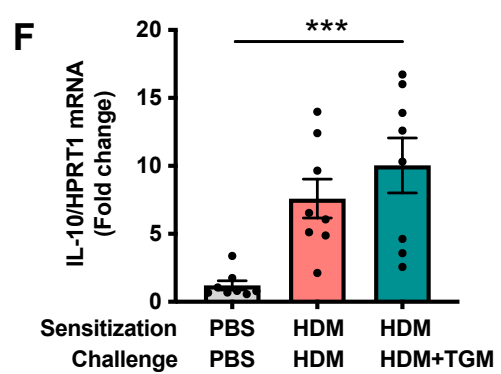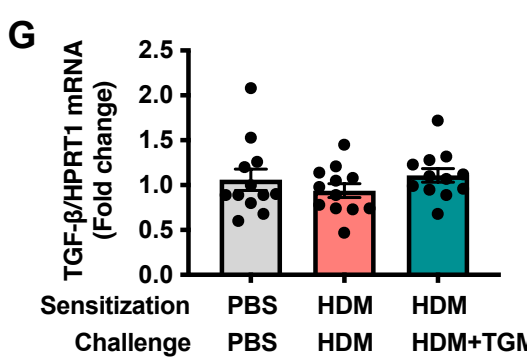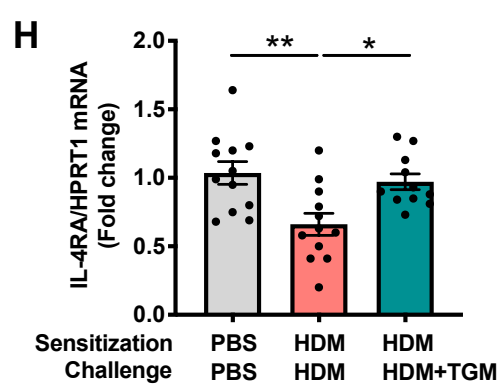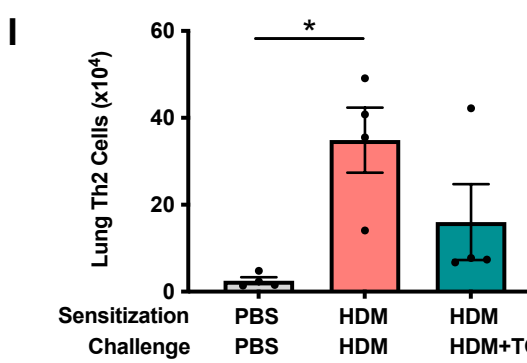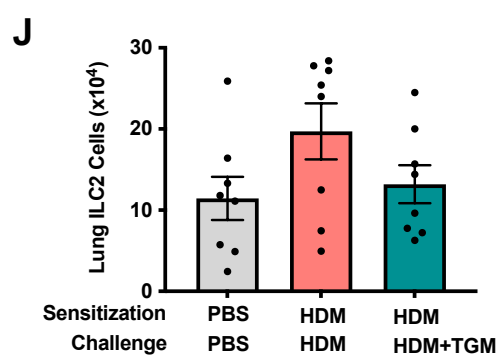

**A**

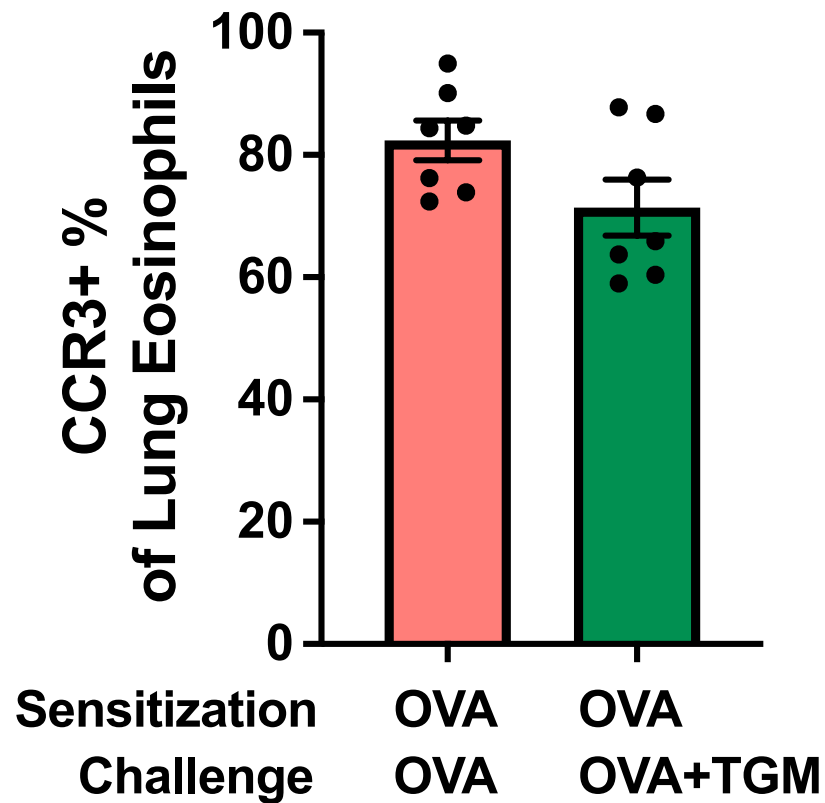

**B**

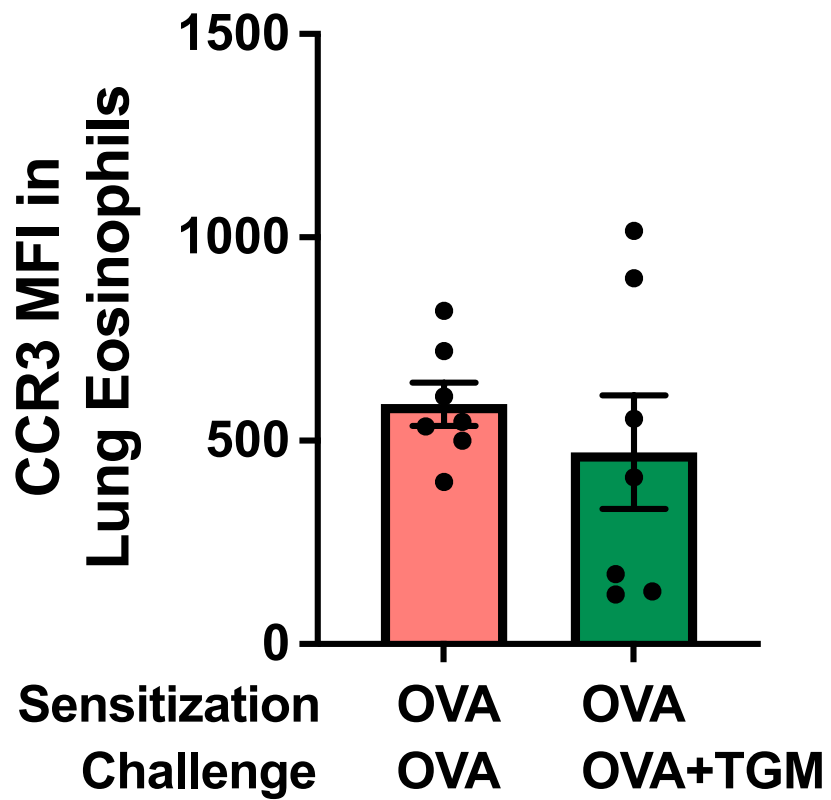

Supplement: EMS163680-supplement-Supplementary_material.pdf [file EMS163680-supplement-Supplementary_material.pdf]
